# Supplementary material for: Diagnosis and Assessment of Autism Spectrum Disorder in South Korea
Source: PubMed Central journal article supplement — J Korean Acad Child Adolesc Psychiatry. 2024 Jan 1;35(1):15–21. doi: 10.5765/jkacap.230009 (PMC10774553; doi:10.5765/jkacap.230009), 2024-01-01
Supplement: jkacap-35-1-15-supple1.pdf [file jkacap-35-1-15-supple1.pdf]

**Supplementary Table 1.** ASD screening tools used in Korea

| Screening tools | Format                                                                   | Age                                                                                                          | Number of items                                          | Time required | Scoring methods                                                                                                                                                                                               | Source                                                                                                                                                                                      | References                                  |
|-----------------|--------------------------------------------------------------------------|--------------------------------------------------------------------------------------------------------------|----------------------------------------------------------|---------------|---------------------------------------------------------------------------------------------------------------------------------------------------------------------------------------------------------------|---------------------------------------------------------------------------------------------------------------------------------------------------------------------------------------------|---------------------------------------------|
| M-CHAT          | Parent report                                                            | 16–30 months                                                                                                 | 23                                                       | 5–10 min      | Diagnostic assessment is recommended if                                                                                                                                                                       | <a href="http://mchatscreen.com">http://mchatscreen.com</a>                                                                                                                                 | Robins et al. [6]                           |
| M-CHAT-R/F      | questionnaire                                                            |                                                                                                              | 20                                                       |               | 1) Three or more items answered “yes”<br>2) Two or more key items “yes” (M-CHAT)/<br>Total scores equal 8 or above (M-CHAT_R/F)<br>Scores between 3 to 7: follow-up interview needed                          | Standardization: M-CHAT only                                                                                                                                                                | Kim et al. [10]                             |
| SCQ             | Parent report<br>questionnaire/<br>“Present” and<br>“Lifetime” version   | 4 years of age<br>or older                                                                                   | 40                                                       | 5–10 min      | If the answer to the first item<br>(whether the kid can say in simple phrases) is “yes”,<br>add scores from item 2<br>If the answer is “no”, add scores from item 8.<br>Cutoff score for lifetime version: 15 | INPSYT                                                                                                                                                                                      | Berument et al. [7]<br>Kim et al. [11]      |
| SRS             | Parent report<br>questionnaire                                           | School age<br>(4–18 years)<br>Preschool<br>(2.5–4.5 years)<br>Adult<br>(over 19 years):<br>adult self-report | 65                                                       | 15–20 min     | T score based on age and gender<br>ASD high-risk group if scores 75 or over                                                                                                                                   | Western Psychological Services<br><a href="https://wpspublish.com">https://wpspublish.com</a><br>Standardization: preschool<br>version only<br>Translated version: all version<br>available | Constantino et al. [8]<br>Cheon et al. [12] |
| BeDevel         | Structured interview+<br>Semi-structured<br>observation based<br>on play | 9–42 months                                                                                                  | Depends on<br>age group<br>(9, 12, 18, 24, 36<br>months) | 10–15 min     | Determine whether to screen according to the<br>number of primary items with diagnostic<br>significance according to age group                                                                                | Korean version developed<br>(publication in preparation)                                                                                                                                    | Bong et al. [13]                            |

ASD, autism spectrum disorder; BeDevel, Behavior Development Screening for Toddlers; M-CHAT, Modified Checklist for Autism in Toddlers; M-CHAT\_R/F, Modified Checklist for Autism in Toddlers Revised with Follow-Up; SCQ, Social Communication Questionnaire; SRS, Social Responsiveness Scale
