# Supplementary material for: Diagnosis and Assessment of Autism Spectrum Disorder in South Korea
Source: PubMed Central journal article supplement — J Korean Acad Child Adolesc Psychiatry. 2024 Jan 1;35(1):15–21. doi: 10.5765/jkacap.230009 (PMC10774553; doi:10.5765/jkacap.230009), 2024-01-01
Supplement: jkacap-35-1-15-supple3.pdf [file jkacap-35-1-15-supple3.pdf]

**Supplementary Table 3.** Genetic disorders associated with ASD

---

22q11.2 deletions

Angelman syndrome

CHARGE syndrome

de Lange syndrome

Fragile X syndrome

MED 12 disorders (including Lujan-Fryns syndrome)

Prader-Willi syndrome

PTEN-associated disorders (Cowden syndrome,  
Bannayan-Riley-Ruvalcaba syndrome)

Rett syndrome

Smith-Lemli-Opitz syndrome

Smith-Magenis syndrome

Sotos syndrome

Tuberous sclerosis

---

ASD, autism spectrum disorder; CHARGE, coloboma, heart defect, atresia choanae, retarded growth and development, genital hypoplasia, ear anomalies/deafness; MED 12, mediator of RNA polymerase II transcription, subunit 12 homolog; PTEN, phosphatase and tensin homolog
