# Supplementary material for: Diagnosis and Assessment of Autism Spectrum Disorder in South Korea
Source: PubMed Central journal article supplement — J Korean Acad Child Adolesc Psychiatry. 2024 Jan 1;35(1):15–21. doi: 10.5765/jkacap.230009 (PMC10774553; doi:10.5765/jkacap.230009), 2024-01-01
Supplement: jkacap-35-1-15-supple4.pdf [file jkacap-35-1-15-supple4.pdf]

**Supplementary Table 4.** Metabolic conditions related to ASD

---

3 $\beta$ -hydroxycholesterol-7-reductase deficiency

(Smith-Lemli-Opitz syndrome)

6-N-trimethyllysine dioxygenase deficiency

Adenylosuccinate lyase deficiency

Cerebral folate deficiency

Cytosolic 5' nucleotidase superactivity

Dihydropyrimidinase deficiency

Disorders of  $\gamma$ -aminobutyric acid metabolism

Phosphoribosylpyrophosphate synthetase superactivity

Succinic semialdehyde dehydrogenase deficiency

Sulfation deficits

---

ASD, autism spectrum disorder
