# Supplementary material for: Diagnosis and Assessment of Autism Spectrum Disorder in South Korea
Source: PubMed Central journal article supplement — J Korean Acad Child Adolesc Psychiatry. 2024 Jan 1;35(1):15–21. doi: 10.5765/jkacap.230009 (PMC10774553; doi:10.5765/jkacap.230009), 2024-01-01
Supplement: jkacap-35-1-15-supple5.pdf [file jkacap-35-1-15-supple5.pdf]

**Supplementary Table 5.** Psychiatric, developmental and functional comorbidities that warrant clinical attention in ASD

| Developmental conditions                            | Mental health problems                                                    | Functional, physical problems                                                                        |
|-----------------------------------------------------|---------------------------------------------------------------------------|------------------------------------------------------------------------------------------------------|
| Intellectual disability and borderline intelligence | Attention deficit hyperactivity disorder                                  | Sleep disorders                                                                                      |
| Communication disorders                             | Anxiety disorders: social anxiety disorder, generalized anxiety disorder, | Feeding and eating disorders                                                                         |
| Motor dysfunction and coordination problems         | separation anxiety disorder, selective mutism and specific phobia         | Gastrointestinal symptoms: constipation, fecal incontinence, digestive insufficiencies, inflammation |
| Specific learning disorder                          | Tic disorders                                                             | Immune impairment                                                                                    |
|                                                     | Obsessive compulsive disorder                                             | Hearing impairment                                                                                   |
|                                                     | Irritability and aggressive behavior                                      | Vision impairment                                                                                    |
|                                                     | Mood disorder: depressive disorder, bipolar disorder                      | Overweight, obesity                                                                                  |
|                                                     | Suicidal idea and attempt                                                 | Metabolic syndrome                                                                                   |
|                                                     | Catatonia                                                                 |                                                                                                      |

ASD, autism spectrum disorder
